# Supplementary material for: Integrating Phylodynamics and Epidemiology to Estimate Transmission Diversity in Viral Epidemics
Source: PubMed Central journal article supplement (PMC3561042; doi:10.1371/journal.pcbi.1002876), 2013-01-31
Supplement: pcbi.1002876.s005.pdf [file pcbi.1002876.s005.pdf]

**Table S1****A.**

|                                      | <b>Subtype 1a</b> | <b>Subtype 1b</b> | <b>Subtype 3a</b> | <b>Subtype 4a</b> |
|--------------------------------------|-------------------|-------------------|-------------------|-------------------|
| <b>Sampling period</b>               | N=24              | N=27              | N=24              | N=22              |
| Range                                | 1994-2003         | 1994-2004         | 1995-2006         | 1995-2004         |
| Median                               | 1998              | 2001              | 2001              | 1999              |
| <b>Age<br/>(at sampling date)</b>    |                   |                   |                   |                   |
| Range                                | 17-53             | 19-76             | 23-46             | 26-69             |
| Median                               | 33                | 54                | 38                | 40                |
| <b>Sex, n(%)</b>                     |                   |                   |                   |                   |
| Male                                 | 19(79)            | 14(52)            | 16(67)            | 13(59)            |
| Female                               | 5(21)             | 13(48)            | 8(33)             | 9(41)             |
| <b>Risk group, n(%)</b>              |                   |                   |                   |                   |
| Transfusion                          | 3(12.5)           | 6(22)             | 1(4)              | 3(14)             |
| Hemophiliac                          | 2(8)              | 0(0)              | 0(0)              | 0(0)              |
| IDU                                  | 12(50)            | 2(7)              | 17(71)            | 2(9)              |
| Other*                               | 4(17)             | 3(11)             | 0(0)              | 1(5)              |
| Unknown                              | 3(12.5)           | 16(59)            | 6(25)             | 16(73)            |
| <b>Successful<br/>PCR/Sequencing</b> |                   |                   |                   |                   |
| E2-P7-NS2                            | 14                | 19                | 19                | 8                 |
| NS5B                                 | 23                | 22                | 21                | 18                |

\*Sexual partner of HCV carrier, hospitalization

**B.**

|                         | <b>Subtype 1a</b> | <b>Subtype 1b</b> | <b>Subtype 3a</b> | <b>Subtype 4a</b> |
|-------------------------|-------------------|-------------------|-------------------|-------------------|
|                         | N=206             | N=537             | N=445             | N=209             |
| <b>Age</b>              |                   |                   |                   |                   |
| Mean (SD)               | 39.4 (14.7)       | 50.0 (14.2)       | 37.5 (11.9)       | 43.3 (13.5)       |
| <b>Sex, n(%)</b>        |                   |                   |                   |                   |
| Male                    | 166 (16.0)        | 303 (29.2)        | 327 (31.5)        | 137 (13.2)        |
| Female                  | 40 (7.3)          | 234 (42.7)        | 118 (21.5)        | 72 (13.1)         |
| <b>Risk group, n(%)</b> |                   |                   |                   |                   |
| Transfusion             | 26 (12.6)         | 136 (25.3)        | 49 (11.0)         | 41 (19.6)         |
| Hemophiliac             | 59 (28.6)         | 49 (9.1)          | 26 (5.8)          | 8 (3.8)           |
| IDU                     | 54 (26.2)         | 34 (6.3)          | 210 (47.2)        | 42 (20.1)         |
| Other*                  | 41 (19.9)         | 115 (21.4)        | 78 (17.5)         | 50 (23.9)         |
| Unknown                 | 26 (12.6)         | 203 (37.8)        | 82 (18.4)         | 68 (32.5)         |

\*Sexual partner of HCV carrier, hospitalization, hemodialysis/renal transplantation, occupational exposure, tattoo
