# Supplementary material for: Integrating Phylodynamics and Epidemiology to Estimate Transmission Diversity in Viral Epidemics
Source: PubMed Central journal article supplement (PMC3561042; doi:10.1371/journal.pcbi.1002876), 2013-01-31
Supplement: pcbi.1002876.s006.pdf [file pcbi.1002876.s006.pdf]

TableS2

| Molecular clock                                      | E2P7NS2                |                   | NS5B<br>Relaxed log-<br>normal | Combined<br>Relaxed log<br>normal | Median Dates<br>of the combined estimation |
|------------------------------------------------------|------------------------|-------------------|--------------------------------|-----------------------------------|--------------------------------------------|
|                                                      | Relaxed log-<br>normal | Strict            |                                |                                   |                                            |
| <b>Subtype 1a</b>                                    |                        |                   |                                |                                   |                                            |
| tMRCA (years)                                        | 35 (13-147)            | 35 (15-144)       | 39 (14-221)                    | 38 (19-71)                        | 1965                                       |
| Rate ( $\times 10^{-3}$ )<br>substitutions/site/year | 2.7 (0.011 - 5.6)      | 2.7 (0.029 - 5.4) | 1.4 (0.58 - 3.4)               | 1.9 (0.32 - 3.8)                  |                                            |
| Coefficient of<br>Variation                          | 0.092                  |                   | 0.31                           | 0.33                              |                                            |
| <b>Subtype 1b</b>                                    |                        |                   |                                |                                   |                                            |
| tMRCA                                                | 48 (24 - 125)          | 48 (27 - 99)      | 34 (17 - 115)                  | 46 (22 - 64)                      | 1958                                       |
| Rate ( $\times 10^{-3}$ )<br>substitutions/site/year | 2.6 (0.56 - 4.6)       | 2.7 (0.92 - 4.6)  | 1.99 (0.18 - 3.7)              | 2.24 (0.83 - 3.8)                 |                                            |
| Coefficient of<br>Variation                          | 0.108                  |                   | 0.26                           | 0.26                              |                                            |
| <b>Subtype 3a</b>                                    |                        |                   |                                |                                   |                                            |
| tMRCA                                                | 30 (19 - 50)           | 30 (22 - 42)      | 52 (16 - 188)                  | 28 (19 - 40)                      | 1975                                       |
| Rate ( $\times 10^{-3}$ )<br>substitutions/site/year | 2.42 (1.13 - 3.73)     | 2.5 (1.46 - 3.5)  | 0.99 (0.11 - 2.24)             | 2.26 (1.33 - 3.45)                |                                            |
| Coefficient of<br>Variation                          | 0.116                  |                   | 0.44                           | 0.58                              |                                            |
| <b>Subtype 4a</b>                                    |                        |                   |                                |                                   |                                            |
| tMRCA                                                | 69 (10-170)            | 32 (13-94)        | 62 (12-770)                    | 36 (12-58)                        | 1967                                       |
| Rate ( $\times 10^{-3}$ )<br>substitutions/site/year | 2.5 (0.013 - 5.0)      | 2.5 (0.27 - 4.7)  | 0.73 (0.004 - 2.4)             | 1.8 (0.47 - 4.4)                  |                                            |
| Coefficient of<br>Variation                          | 0.117                  |                   | 0.45                           | 0.56                              |                                            |
