# Supplementary material for: Integrating Phylodynamics and Epidemiology to Estimate Transmission Diversity in Viral Epidemics
Source: PubMed Central journal article supplement (PMC3561042; doi:10.1371/journal.pcbi.1002876), 2013-01-31
Supplement: pcbi.1002876.s007.pdf [file pcbi.1002876.s007.pdf]

**Table S3**

Subtype 1a

|                 |    | Infectivity period |     |     |
|-----------------|----|--------------------|-----|-----|
|                 |    | Years              | 30  | 40  |
| Life expectancy | 60 | 2.8                | 3.2 | 3.5 |
|                 | 70 | 2.9                | 3.4 | 3.7 |
|                 | 80 | 3.0                | 3.5 | 3.8 |
|                 | 90 | 3.1                | 3.6 | 4.0 |

Subtype 1b

|                 |    | Infectivity period |     |     |
|-----------------|----|--------------------|-----|-----|
|                 |    | Years              | 30  | 40  |
| Life expectancy | 60 | 3.8                | 4.3 | 4.8 |
|                 | 70 | 3.9                | 4.5 | 5.0 |
|                 | 80 | 4.0                | 4.7 | 5.3 |
|                 | 90 | 4.1                | 4.8 | 5.5 |

Subtype 3a

|                 |    | Infectivity period |      |      |
|-----------------|----|--------------------|------|------|
|                 |    | Years              | 30   | 40   |
| Life expectancy | 60 | 9.2                | 10.9 | 12.2 |
|                 | 70 | 9.6                | 11.5 | 13.0 |
|                 | 80 | 10.0               | 12.0 | 13.7 |
|                 | 90 | 10.3               | 12.4 | 14.2 |

Subtype 4a

|                 |    | Infectivity period |     |     |
|-----------------|----|--------------------|-----|-----|
|                 |    | Years              | 30  | 40  |
| Life expectancy | 60 | 2.1                | 2.3 | 2.5 |
|                 | 70 | 2.1                | 2.4 | 2.6 |
|                 | 80 | 2.2                | 2.5 | 2.7 |
|                 | 90 | 2.2                | 2.5 | 2.8 |
