# Supplementary material for: Integrating Phylodynamics and Epidemiology to Estimate Transmission Diversity in Viral Epidemics
Source: PLoS Comput Biol. 2013 Jan 31;9(1):e1002876. doi: 10.1371/journal.pcbi.1002876 (PMC3561042; doi:10.1371/journal.pcbi.1002876)
Supplement: Table S4 — Regression analysis of the percentage of the risk group per genotype with the spread metrics PPT and R 0 per genotype in the study population: coefficients of determination (Pearson's R2) are shown with associated level of significance (P value). (PDF) [file pcbi.1002876.s008.pdf]

**Table S4**

|                       |                    | <i>PPT=N/(NeT)</i>   |                | <b>R<sub>0</sub></b> |                |
|-----------------------|--------------------|----------------------|----------------|----------------------|----------------|
|                       |                    | <b>R<sup>2</sup></b> | <b>P value</b> | <b>R<sup>2</sup></b> | <b>P value</b> |
| <b>Risk group (%)</b> | <b>Iatrogenic</b>  | 0.43                 | 0.34           | 0.83                 | 0.1            |
|                       | <b>Transfusion</b> | 0.53                 | 0.27           | 0.39                 | 0.37           |
|                       | <b>IDU</b>         | 0.95                 | 0.02           | 0.60                 | 0.22           |
|                       | <b>Other</b>       | 0.31                 | 0.45           | 0.08                 | 0.71           |
